# Supplementary material for: MOF-derived porous Fe2O3 with controllable shapes and improved catalytic activities in H2S selective oxidation
Source: Royal Society of Chemistry journal article supplement (doi:10.1039/c8ce00552d), 2018-01-01
Supplement: c8ce00552d1.pdf [file c8ce00552d1.pdf]

Electronic Supplementary Information for  
**MOF-derived porous Fe<sub>2</sub>O<sub>3</sub> with controllable shapes and  
improved catalytic activities in H<sub>2</sub>S selective oxidation**

Yingying Zhan, Lijuan Shen, Congbo Xu, Wentao Zhao, Yanning Cao and Lilong Jiang\*

*National Engineering Research Center of Chemical Fertilizer Catalyst, Fuzhou University,*

*Fuzhou, 350002, P.R. China*

*E-mail Address: [jll@fzu.edu.cn](mailto:jll@fzu.edu.cn)*

## **Experimental section**

### **Preparation**

#### **Materials**

All reagents obtained from commercial sources were used without any further purification unless otherwise stated. FeCl<sub>3</sub>·6H<sub>2</sub>O, N,N-dimethylformamide (DMF), acetic acid (HAc) were purchased from Sinopharm Chemical Reagent Co., Ltd. (Shanghai, China) and used as received without further purification. Terephthalic acid (H<sub>2</sub>BDC) was supplied by Alfa Aesar China Co., Ltd. (Tianjin, China). Deionized (DI) water used in the synthesis was from local sources. Commercial Fe<sub>2</sub>O<sub>3</sub> was supplied by Fucheng. China Co., Ltd (Tianjin, China).

#### **Synthesis of MIL-53(Fe)-xH**

MIL-53(Fe) was synthesized with minor modifications according to the reported procedures<sup>1</sup>: First 0.618 g of H<sub>2</sub>BDC and 2.025 g of FeCl<sub>3</sub>·6H<sub>2</sub>O were separately dissolved in 22.5 mL of DMF. Afterward, both solutions were mixed in a beaker and stirred for 10 min. The mixture was transferred to a Teflon-lined stainless-steel bomb and heated at 170 °C for 24 h. The product, MIL-53(Fe), was collected, washed with methanol for four times, and then heated at 80 °C for 6 h. After cooling to room temperature, the MIL-53(Fe) product was heated at 100 °C for 12 h under vacuum to remove solvent molecules in the pores. In the modulated synthesis, 0–10 mL of 95% HAc was also added to the mixture. According to the content of HAc, the synthesized samples are herein labeled as MIL-53(Fe)-xH (*x* represents the volume of introduced HAc; *x*=0, 3, 5, 10).

## Synthesis of Fe<sub>2</sub>O<sub>3</sub>-xH

The obtained MIL-53 (Fe)-xH samples were thermally treated in 50 % N<sub>2</sub>/O<sub>2</sub> at 500 °C for 3 h. The pyrolyzed products are herein denoted as Fe<sub>2</sub>O<sub>3</sub>-xH (x represent the added content of HAc in precursors; x=0, 3, 5, 10)

## Catalyst characterization

Thermogravimetric measurements (TGA) were carried out using a TGA7 (Perkin-Elmer) thermal analyzer. The experiments were performed under an air stream from 50 to 800 °C, with a heating rate of 5 °C min<sup>-1</sup>. The catalysts were characterized by a powder X-ray diffractometer (Panalytical X' Pert PRO) using Cu K $\alpha$  ( $\lambda=0.15406\text{nm}$ ) radiation operating at 40 kV and 40 mA. The FT-IR spectra were measured on Nicolet NEXUS 670. Scanning electron microscopy (SEM) images were collected on an S-4800 (Hitachi, Japan) scanning electron microscope at an accelerating voltage of 5 kV. Texture parameters of samples were measured by N<sub>2</sub> adsorption-desorption using an ASAP2020 instrument (Micromeritics, American). Transmission electron microscopic (TEM) investigation was performed on an FEI Tecnai G2 F20 transmission microscope. X-ray photoelectron spectroscopy (XPS) was used to characterize the surface region of catalysts (Phi Quantum 2000).

## Evaluation of catalytic activity

All tests were performed in a continuous flow fixed-bed quartz reactor at atmospheric pressure with 0.2 g of catalyst (20–40 mesh) placed in the central section of the reactor. A mixture gas containing 5000 ppm of H<sub>2</sub>S, 2500 ppm of O<sub>2</sub> and balance gas (N<sub>2</sub>) was fed into the reactor at a total gas flow rate of 10 mL/min (GHSV = 3000 h<sup>-1</sup>), and the reaction was conducted in the temperature range of 60–180 °C. During reaction, the effluent stream was analyzed by a gas chromatograph (GC9790 II) equipped with a FPD and TCD. A condenser was located at the bottom of the reactor to trap sulfur in the effluent stream. Instantaneous fractional conversion of H<sub>2</sub>S, sulfur selectivity, and sulfur yield are defined as follows:

$$\text{H}_2\text{S conversion} = \frac{[\text{H}_2\text{S}]_{\text{in}} - [\text{H}_2\text{S}]_{\text{out}}}{[\text{H}_2\text{S}]_{\text{in}}}$$

$$\text{Sulfur selectivity} = \frac{[\text{H}_2\text{S}]_{\text{in}} - [\text{H}_2\text{S}]_{\text{out}} - [\text{SO}_2]_{\text{out}}}{[\text{H}_2\text{S}]_{\text{in}} - [\text{H}_2\text{S}]_{\text{out}}}$$

$$\text{Sulfur yield} = [\text{H}_2\text{S conversion}] \times [\text{sulfur selectivity}]$$

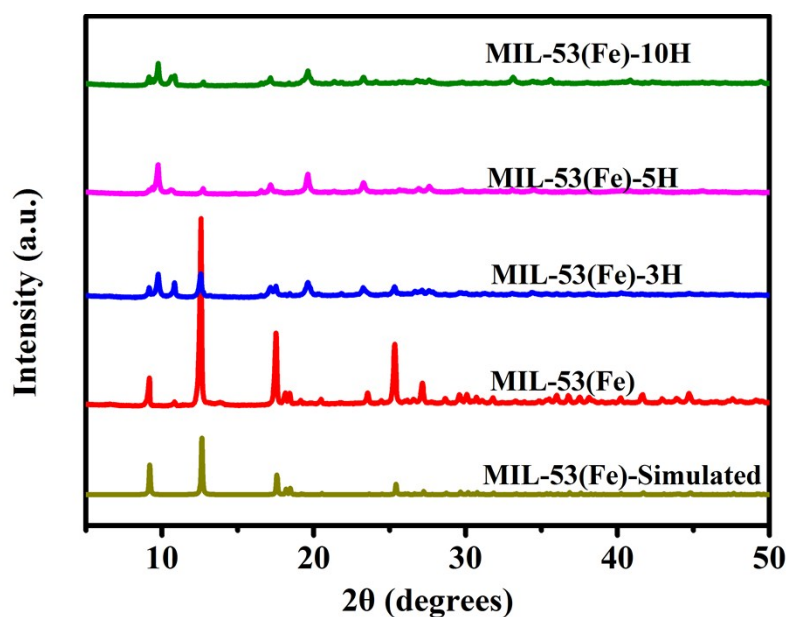

Fig. S1 XRD patterns of MIL-53(Fe)-*x*H.

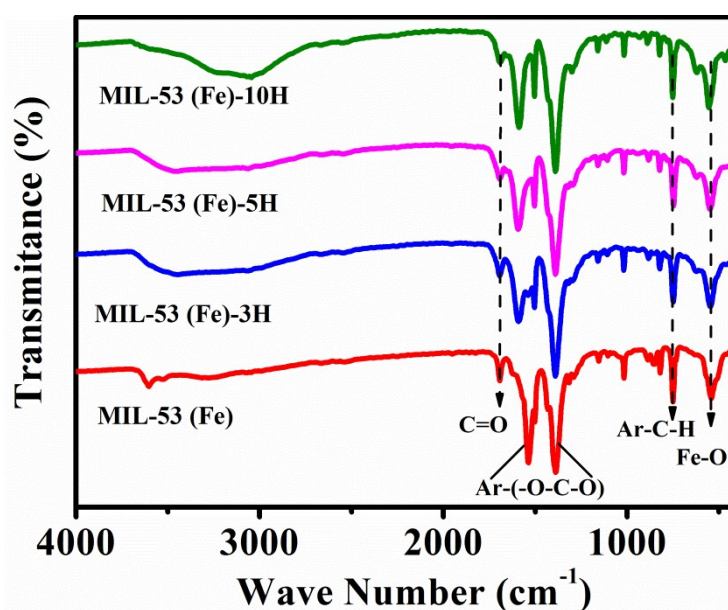

Fig.S2 FTIR spectrum of MIL-53(Fe)-*x*H.

To identify the functional groups of the MIL-53(Fe)-*x*H samples, FTIR spectroscopic studies were performed in the wavelength range of 400–4000  $\text{cm}^{-1}$  and the results are shown in Fig. S2. The characteristic absorption peaks of the MIL-53(Fe)-*x*H samples appeared at 1680, 1543, 1396, 1020, and 750  $\text{cm}^{-1}$ , which could be ascribed to the carboxylate groups vibrations as reported in literature.<sup>2,3</sup> The two sharp peaks around 1543 and 1396  $\text{cm}^{-1}$  are assigned to asymmetric and symmetric

vibrations of carboxyl groups, respectively, confirming the presence of dicarboxylate linker in these samples. Two strong bands at  $750\text{ cm}^{-1}$  and  $540\text{ cm}^{-1}$  are attributed to Ar–C–H and Fe–O vibrations respectively.

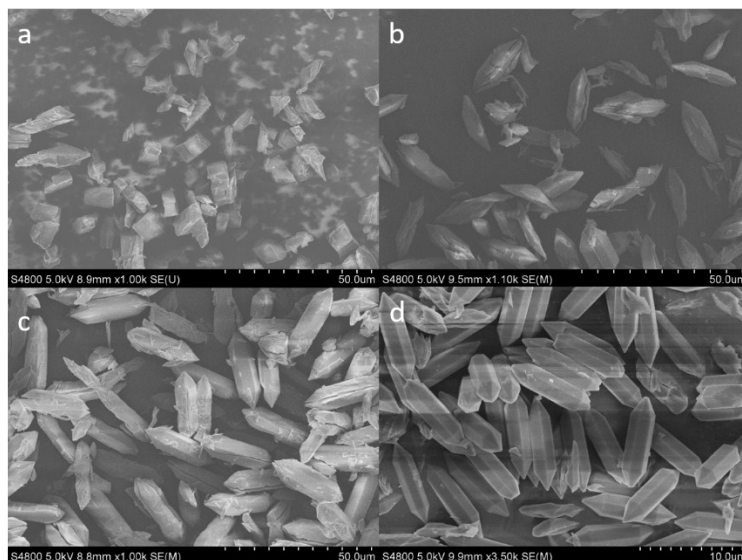

**Fig. S3** (a) SEM images of MIL-53(Fe), and MIL-53(Fe)-3H prepared with different reaction periods (b) 10 h; (c) 15 h; (d) 24 h.

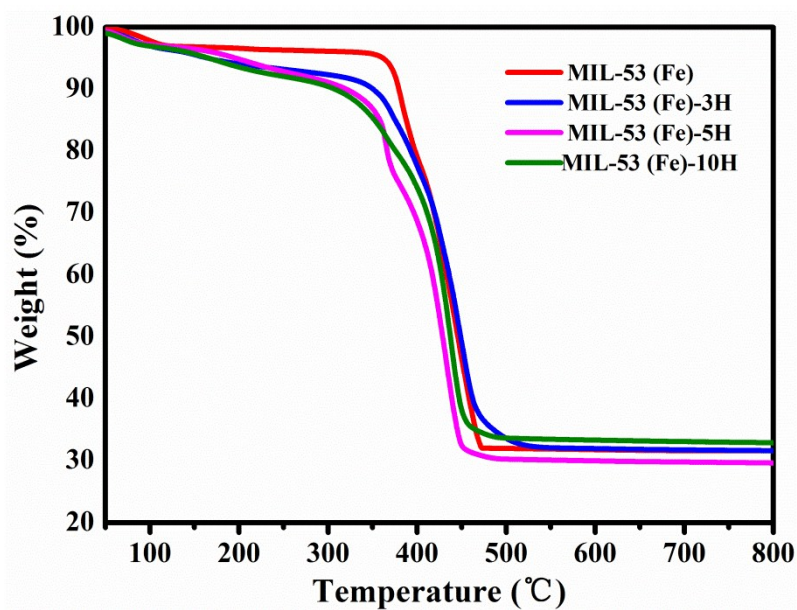

**Fig. S4** TGA curves of MIL-53(Fe)-xH in air.

The thermal stabilities of the as-synthesized MIL-53(Fe)-*x*H were investigated by thermogravimetric (TGA) analysis in synthetic air from 50 to 800 °C. As shown in **Fig. S4**, the samples undergo two clear weight-loss steps between 100 °C and 500 °C. The first weight-loss at 120 °C corresponds to the evacuation of guest molecules; while the second one around 500 °C is ascribed to the decomposition of the MIL-53(Fe)-*x*H framework. Thus, a calcination temperature of 500 °C is the most suitable to obtain iron oxides with the original MOFs morphologies.

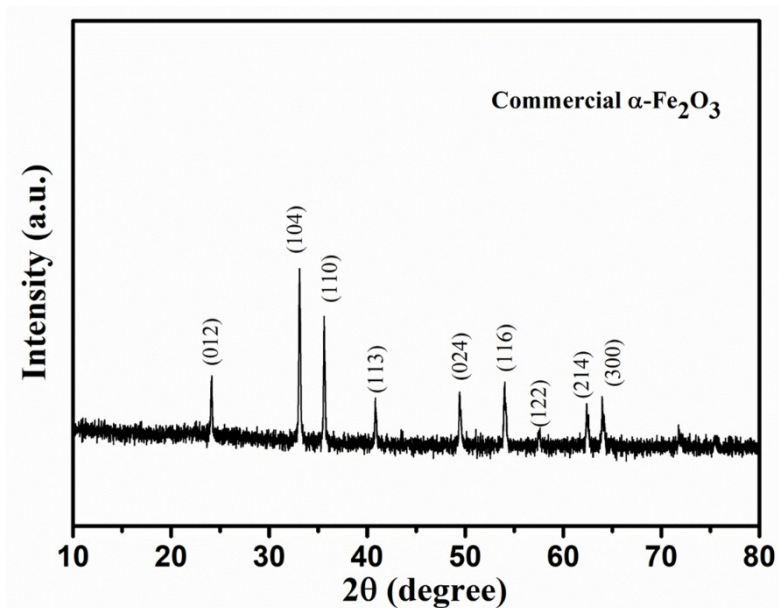

**Fig. S5** XRD pattern of commercial  $\alpha$ - $\text{Fe}_2\text{O}_3$ .

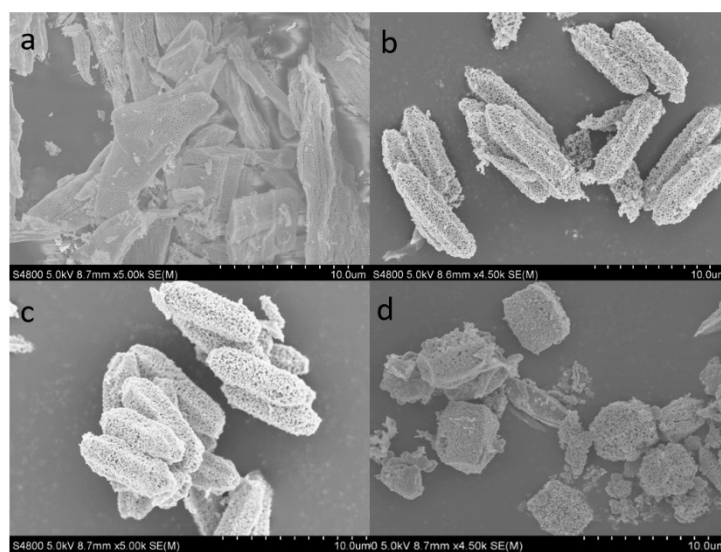

**Fig. S6** SEM images of  $\text{Fe}_2\text{O}_3$ -*x*H samples: (a)  $\text{Fe}_2\text{O}_3$ ; (b)  $\text{Fe}_2\text{O}_3$ -3H; (c)  $\text{Fe}_2\text{O}_3$ -5H; (d)  $\text{Fe}_2\text{O}_3$ -10H.

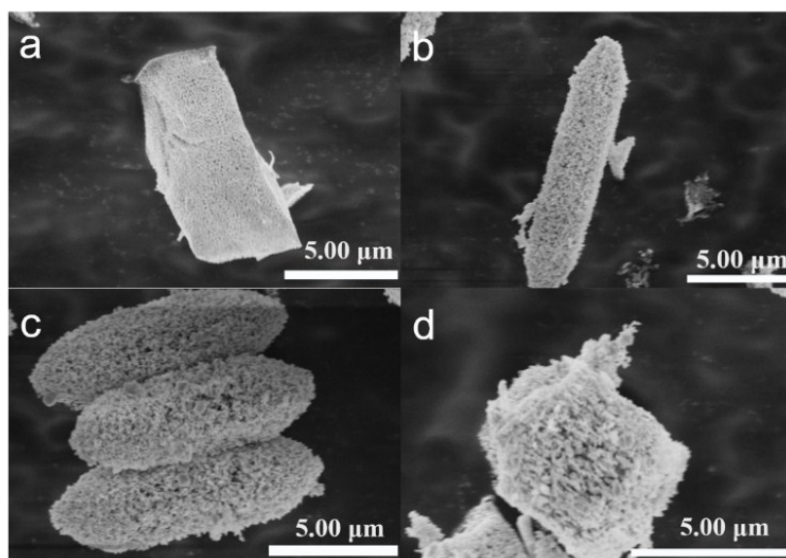

**Fig. S7** SEM images of Fe<sub>2</sub>O<sub>3</sub>-xH samples: (a) Fe<sub>2</sub>O<sub>3</sub>; (b) Fe<sub>2</sub>O<sub>3</sub>-3H; (c) Fe<sub>2</sub>O<sub>3</sub>-5H; (d) Fe<sub>2</sub>O<sub>3</sub>-10H.

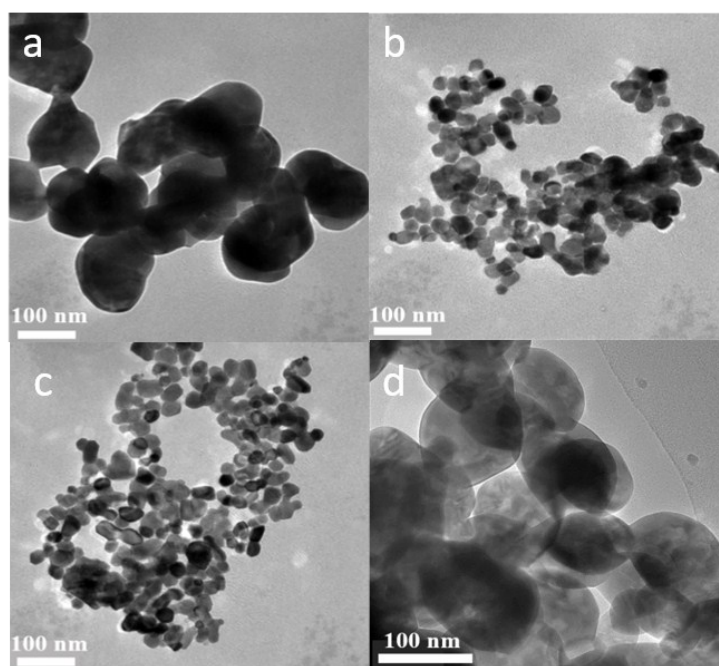

**Fig. S8** TEM images of Fe<sub>2</sub>O<sub>3</sub>-xH samples: (a) Fe<sub>2</sub>O<sub>3</sub>; (b) Fe<sub>2</sub>O<sub>3</sub>-3H; (c) Fe<sub>2</sub>O<sub>3</sub>-5H; (d) Fe<sub>2</sub>O<sub>3</sub>-10H.

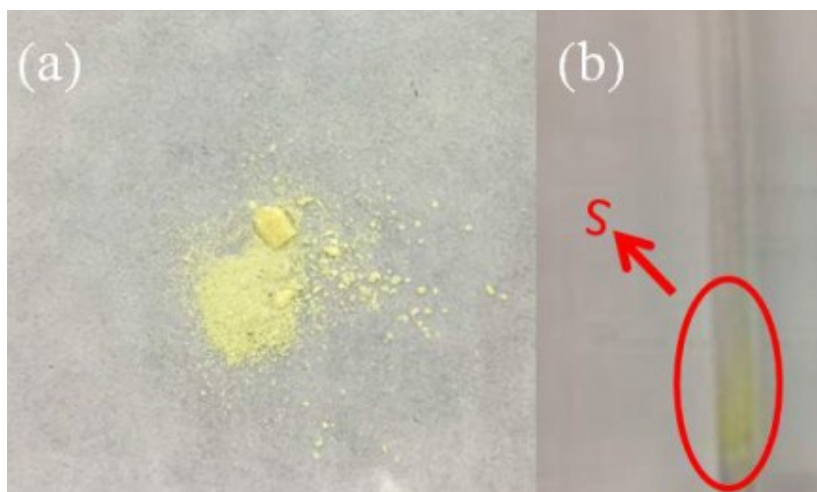

**Fig. S9** Recovered sulfur.

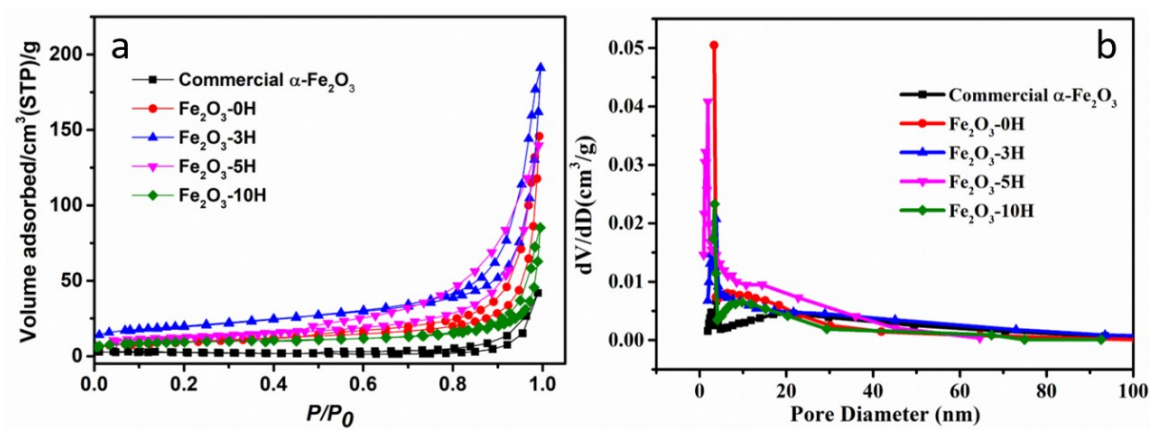

**Fig. S10** (a)  $\text{N}_2$  adsorption-desorption isotherms and (b) pore size distributions of  $\text{Fe}_2\text{O}_3$ -xH and commercial  $\alpha$ - $\text{Fe}_2\text{O}_3$  samples.

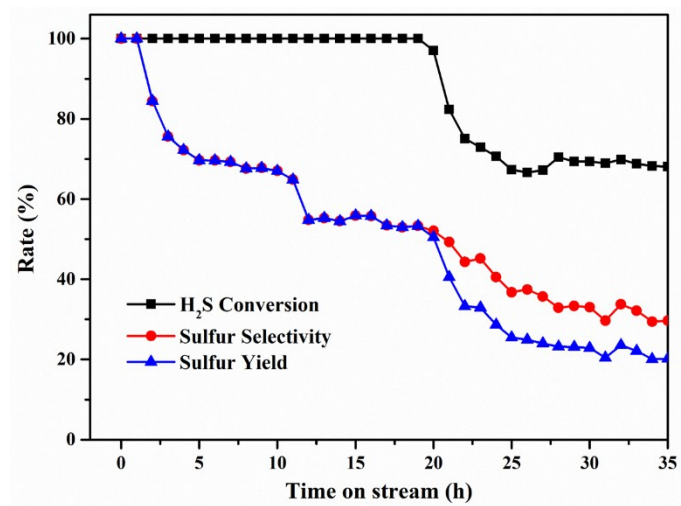

Fig. S11 Long-term stability of commercial Fe<sub>2</sub>O<sub>3</sub> catalysts at 180 °C.

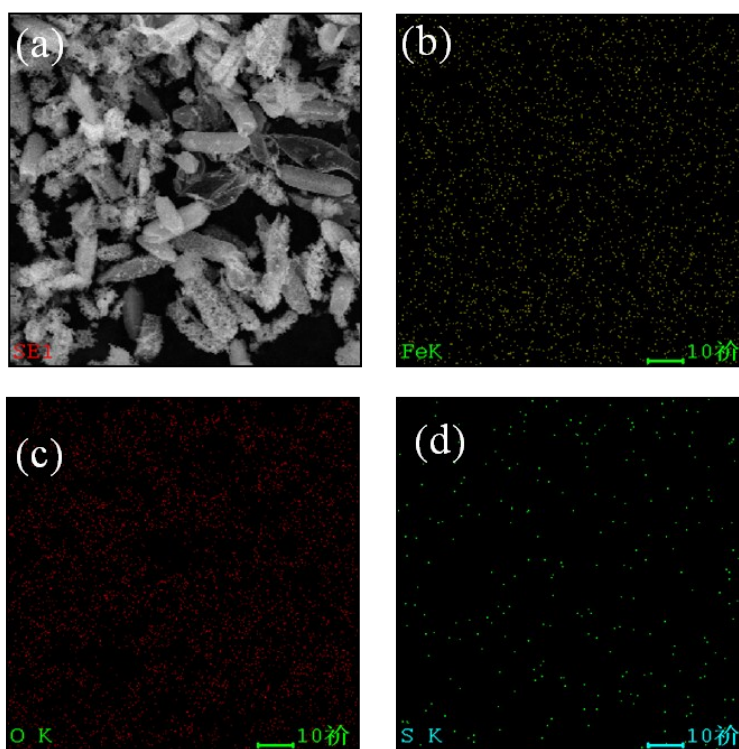

Fig.S12 SEM image and EDX mapping of the used Fe<sub>2</sub>O<sub>3</sub>-3H catalyst.



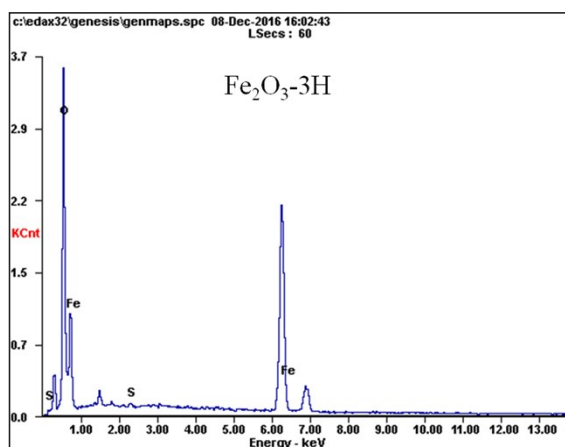

| Element | Wt%        | At%   |
|---------|------------|-------|
| OK      | 29.90      | 59.78 |
| SK      | 00.15      | 00.15 |
| FeK     | 69.95      | 40.07 |
| Matrix  | Correction | ZAF   |

Fig.S13 EDX results of the used Fe<sub>2</sub>O<sub>3</sub>-3H catalyst.

Table S1 Textural parameters of Fe<sub>2</sub>O<sub>3</sub>-xH and commercial α-Fe<sub>2</sub>O<sub>3</sub> samples.

| Sample                                      | Surface area (m <sup>2</sup> /g) | Pore volume (cm <sup>3</sup> /g) | Average pore size (nm) |
|---------------------------------------------|----------------------------------|----------------------------------|------------------------|
| Fe <sub>2</sub> O <sub>3</sub> -0H          | 29.8                             | 0.107                            | 15.9                   |
| Fe <sub>2</sub> O <sub>3</sub> -3H          | 40.6                             | 0.218                            | 7.07                   |
| Fe <sub>2</sub> O <sub>3</sub> -5H          | 35.3                             | 0.185                            | 14.1                   |
| Fe <sub>2</sub> O <sub>3</sub> -10H         | 30.9                             | 0.171                            | 13.7                   |
| Commercial α-Fe <sub>2</sub> O <sub>3</sub> | 5.72                             | 0.019                            | 9.5                    |

## References

1. P. Horcajada, C. Serre, G. Maurin, N. A. Ramsahye, F. Balas, M. Vallet-Regí, M. Sebban, F. Taulelle and G. Férey, *J. Am. Chem. Soc.*, 2008, **130**, 6774–6780.
2. T. A. Vu, G. H. Le, C. D. Dao, L. Q. Dang, K. T. Nguyen, Q. K. Nguyen, P. T. Dang, H.T.K. Tran, Q. T. Duong, T. V. Nguyen and G. D. Lee, *RSC Adv.*, 2015, **5**, 5261–5268.
3. L. Ai, L. Li, C. Zhang, J. Fu and J. Jiang, *Chem-Eur. J.*, 2013, **19**, 15105–15108.
